# Supplementary material
Source: Springer Nature journal article supplement (https://www.springermedizin.de/resource/supplementary/12876_2011_693_MOESM5_ESM.pdf/9437768)

**A**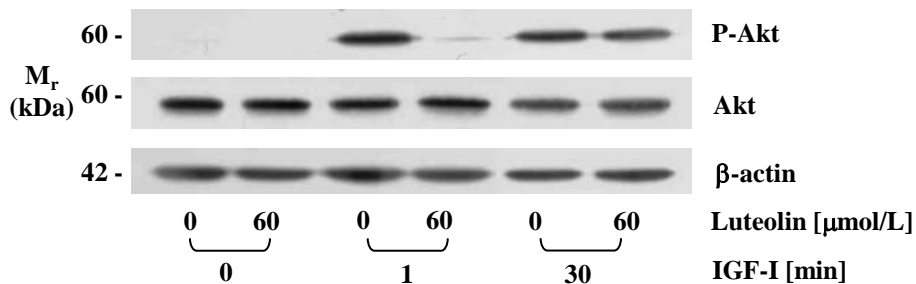**B**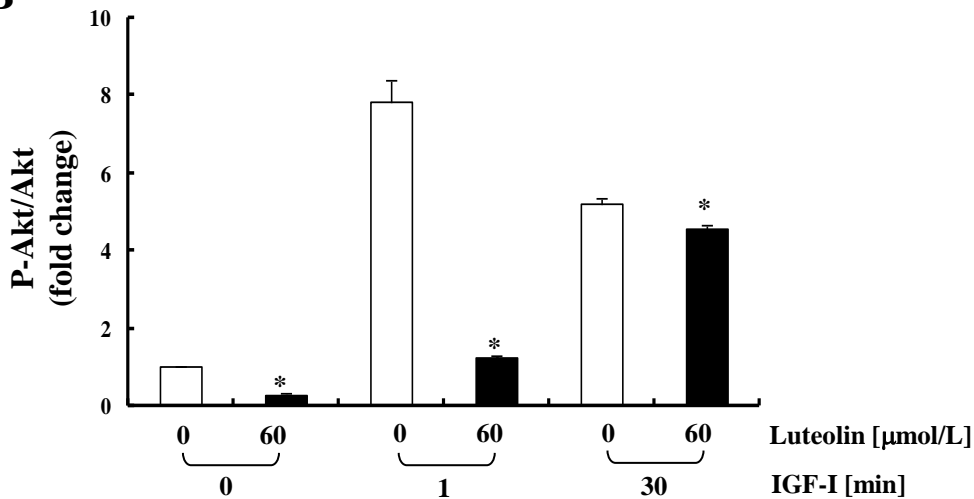

Supplement: MOESM5 [file 9437768]
